# Supplementary material for: Deep insights into polymorphism initiated by exploring multicolor conversion materials
Source: Royal Society of Chemistry journal article supplement (doi:10.1039/c9qm00293f), 2019-01-01
Supplement: c9qm00293f1.pdf [file c9qm00293f1.pdf]

## **Supporting Information For: The deep insights into polymorphism initiated by exploring multicolor conversion materials**

Yongtao Wang<sup>\*a</sup>, Wenjing Liu<sup>b</sup>, Guixian Ge<sup>\*b</sup> and Litong Ren<sup>b</sup>

<sup>a</sup>Guangxi Key Laboratory of Electrochemical and Magneto-chemical Function Material, College of Chemistry and Bioengineering, Guilin University of Technology, Guilin 541004, China.

<sup>b</sup>Shihezi University, Shihezi 832003, P. R. China

\*Author for correspondence: wyt\_shzu@163.com; [geguixian@126.com](mailto:geguixian@126.com).

### **Experimental**

#### **Measurement and characterization**

The UV-vis spectra were determined on a Mapada UV-3200pcs spectrophotometer. Fluorescence measurements were taken on Agilent Cary Eclipse fluorescence spectrophotometer. Fluorescent quantum yields of solids were obtained by FLs980 full-featured Steady/Transient Fluorescence Spectrometer (Edinburgh). <sup>1</sup>H NMR spectra and <sup>13</sup>C NMR spectra were obtained with a Varian inova instrument at 400 MHz and 100 MHz using tetramethylsilane (TMS) as the internal standard, and CDCl<sub>3</sub> as the solvent in all cases. Glass transition temperature and melting point were measured by carried out DSC measurements using DSC Q2000 (TA, America). MALDI/HRMS were record on an UltrafleXtreme MALDI-TOF/TOF mass spectrometer (Bruker, Germany). Powder XRD measurements were performed on the D8 Advance (Bruker) with Cu K $\alpha$  radiation in the range of  $10^\circ < 2\theta < 90^\circ$ .

#### **Materials and Synthesis**

THF and CH<sub>2</sub>Cl<sub>2</sub> were dried according to standardized procedures previously described. All the other chemicals and reagents used in this study were of analytical grade without further purification. In general, all the intermediates and final compounds were purified by column chromatography on silicagel (200-300 mesh), and crystallization from analytical grade solvents. Reactions were monitored by using thin layer chromatography (TLC).

According to the reported method, benzophenone was used as a reagent to synthesize TPE; then TPE and acetyl chloride were acylated by Friedel-Crafts to obtain compound Ac-TPE; condensation with methyl fumarate and NaH (60%) by Claisen. The boron complexes were synthesized to produce a β-diketones intermediate which were then boronated with BF<sub>3</sub>·OEt<sub>2</sub> in CH<sub>2</sub>Cl<sub>2</sub>. The target molecules were characterized by <sup>1</sup>H NMR, <sup>13</sup>C NMR.

**2,2-difluoro-4-(furan-2-yl)-6-(4-(1,2,2-triphenylvinyl)phenyl)-2H-1,3,2-dioxaborinane (TPEB2F)**

Adding methyl 2-furoate (0.98g, 7.8mmol) to THF solution in which acetyl-TPE (1g, 2.6mmol) is dissolved, then NaH (60% 0.16 g, 3.9 mmol) was quickly added, and the mixture was heated to 75 °C in an oil bath under argon and refluxed for 12 hours. TLC detection reaction progress (petroleum ether/ ethyl acetate=15/1). After completion of the reaction, the reaction solution was cooled to room temperature, and added diluted hydrochloric acid, poured into ice water, extracted with dichloromethane, and organic layer was collected. The organic layer was dried over anhydrous Na<sub>2</sub>SO<sub>4</sub>, the solvent was removed under reduced pressure, brown oily

$\beta$ -diketone precursor was obtained. The diketone precursor was dried under vacuum and then dissolved in 20 ml of dichloromethane, added boron trifluoride diethyl ether complex to the above solution, stirred at room temperature in argon atmosphere for 24 hours. The mixture was quenched by the addition of water, and the organic layer was collected and dried over anhydrous  $\text{Na}_2\text{SO}_4$ . The crude product was purified by column chromatography (silica gel, 5:1 v/v, petroleum ether/ ethyl acetate) to afford product **TPEB2F** as orange solid, yield 63%, m.p. 190.0–192.0°C.  $^1\text{H}$  NMR (400 MHz,  $\text{CDCl}_3$ )  $\delta$  7.98-7.82 (m, 2H), 7.75 (dd,  $J=1.7, 0.8$  Hz, 1H), 7.57 (dd,  $J=3.7, 0.8$  Hz, 1H), 7.24-7.10 (m, 11H), 7.08-6.97 (m, 7H), 6.71 (dd,  $J=3.7, 1.7$  Hz, 1H) (**Fig. S5**).  $^{13}\text{C}$  NMR (101 MHz,  $\text{CDCl}_3$ )  $\delta$  182.06, 170.89, 151.79, 149.28, 148.46, 143.79, 142.91, 142.86, 142.68, 139.50, 132.10, 131.33, 131.31, 131.24, 129.56, 128.43, 128.06, 128.02, 127.76, 127.31, 127.05, 127.02, 121.33, 114.22, 92.43, 0.01(**Fig. S6**). HRMS (MALDI-TOF):  $m/z$  539.1598,  $[\text{M}+\text{Na}]^+$ , calculated 539.1606(**Fig. S11**).

**2,2-difluoro-4-(furan-3-yl)-6-(4-(1,2,2-triphenylvinyl)phenyl)-2H-1,3,13,214-dioxaborinine (TPEB3F)**

Compound **TPEB3F** was prepared by following the synthetic procedure for compound **TPEB2F**.

Methyl 3-Furancarboxylate was condensed with acetyl-TPE to give  $\beta$ -diketone. The brown crude  $\beta$ -diketone precursor coordinated with  $\text{BF}_3\cdot\text{OEt}_2$  in  $\text{CH}_2\text{Cl}_2$ , the crude product was purified by column chromatography (silica gel, 5:1 v/v, petroleum ether/ ethyl acetate) to afford **TPEB3F** as a light green solid, yield 58%, m.p. 208.2–210.8°C  $^1\text{H}$  NMR (400 MHz,  $\text{CDCl}_3$ )  $\delta$  8.31 (t,  $J=1.1$  Hz, 1H), 7.84 (d,  $J=8.6$  Hz, 2H), 7.55 (t,

J=1.7 Hz, 1H), 7.23-7.11 (m, 11H), 7.05-6.99 (m, 6H), 6.84 (dd, J=2.1, 0.8 Hz, 1H), 6.72 (s, 1H) (**Fig. S7**).  $^{13}\text{C}$  NMR (101 MHz,  $\text{CDCl}_3$ )  $\delta$  182.02, 177.69, 154.28, 151.82, 149.26, 145.26, 143.80, 142.88, 142.86, 142.66, 139.45, 132.11, 131.32, 131.24, 129.33, 128.36, 128.06, 128.03, 127.78, 127.31, 127.07, 127.03, 122.62, 108.33, 93.92(**Fig. S8**). HRMS (MALDI-TOF):  $m/z$  539.1605,  $[\text{M}+\text{Na}]^+$ , calculated 539.1606(**Fig. S12**).

**Table S1.** Peak absorption/emission wavelengths ( $\lambda$ , in nm) of **TPEB2F** and **TPEB3F** in hexane, DCM, THF and DMSO.

|               | <b>TPEB2F</b>                     |                                  | <b>TPEB3F</b>                     |                                  |
|---------------|-----------------------------------|----------------------------------|-----------------------------------|----------------------------------|
|               | $\lambda_{\text{abs}}(\text{nm})$ | $\lambda_{\text{em}}(\text{nm})$ | $\lambda_{\text{abs}}(\text{nm})$ | $\lambda_{\text{em}}(\text{nm})$ |
| <b>Hexane</b> | 363,418                           | 509                              | 348,403                           | 495                              |
| <b>DCM</b>    | 375,429                           | 623                              | 359,414                           | 612                              |
| <b>THF</b>    | 373,425                           | 590                              | 358,407                           | 550                              |
| <b>DMSO</b>   | 381,433                           | 649                              | 368,414                           | 633                              |

**Table S2.** Peak emission wavelengths ( $\lambda$ , in nm) and quantum yields ( $\Phi$ ) of five crystals in different solid states.

|                             | <b>2R</b> | <b>3Y</b> | <b>3R</b> | <b>3N</b> | <b>3F</b> |
|-----------------------------|-----------|-----------|-----------|-----------|-----------|
| $\lambda_{\text{solid}}$    | 560       | 553       | 553       | 553       | 553       |
| $\lambda_{\text{crystals}}$ | 586       | 547       | 580       | 617       | 602       |
| $\lambda_{\text{sg}}$       | 589       | 536       | 566       | 569       | 574       |
| $\lambda_{\text{ground}}$   | 608       | 587       | 567       | 609       | 611       |
| $\lambda_{\text{fumed}}$    | 584       | 566       | 572       | 592       | 575       |
| $\lambda_{\text{heated}}$   | 584       | 565       | 566       | 574       | 575       |
| $\Delta\lambda_1$           | 3         | -11       | -14       | -48       | -28       |
| $\Delta\lambda_2$           | 22        | 40        | -13       | -8        | 9         |
| $\Phi_{\text{crystals}}$    | 0.093     | 0.192     | 0.016     | --        | --        |
| $\Phi_{\text{ground}}$      | 0.366     | 0.160     | 0.092     | --        | --        |

$\lambda_{\text{sg}} = \lambda_{\text{slightly ground}}$ ,  $\Delta\lambda_1 = \lambda_{\text{sg}} - \lambda_{\text{crystals}}$ ,  $\Delta\lambda_2 = \lambda_{\text{ground}} - \lambda_{\text{crystals}}$ , "--", represent blue shift. 0.092 is the quantum yields of 3R after slightly grinding.

**Table S3.** Energy level, minimum energy and dipole moment of each crystal, **2Ya-d** were constructed based on crystals **3Y**.

|                 | Dipole(dye)     |                | Etotal(a.u.)   |
|-----------------|-----------------|----------------|----------------|
|                 | Single molecule | Molecular pair |                |
| 2R              | 7.4611          | 0.0001         | -3443.57201214 |
| 2Y <sub>a</sub> |                 | 1.3942         | -3443.56998296 |

|                 |        |        |                |
|-----------------|--------|--------|----------------|
| 2Y <sub>b</sub> |        | 5.6834 | -3443.57089941 |
| 2Y <sub>c</sub> |        | 5.3682 | -3443.57149546 |
| 2Y <sub>d</sub> |        | 3.5036 | -3443.57270219 |
| 3F              |        | 0.0002 | -3443.57059234 |
| 3N              |        | 0.0002 | -3443.57059235 |
| 3R              | 7.2363 | 0.0000 | -3443.57046053 |
| 3Y              | 8.1469 | 0.2270 | -3443.57144147 |

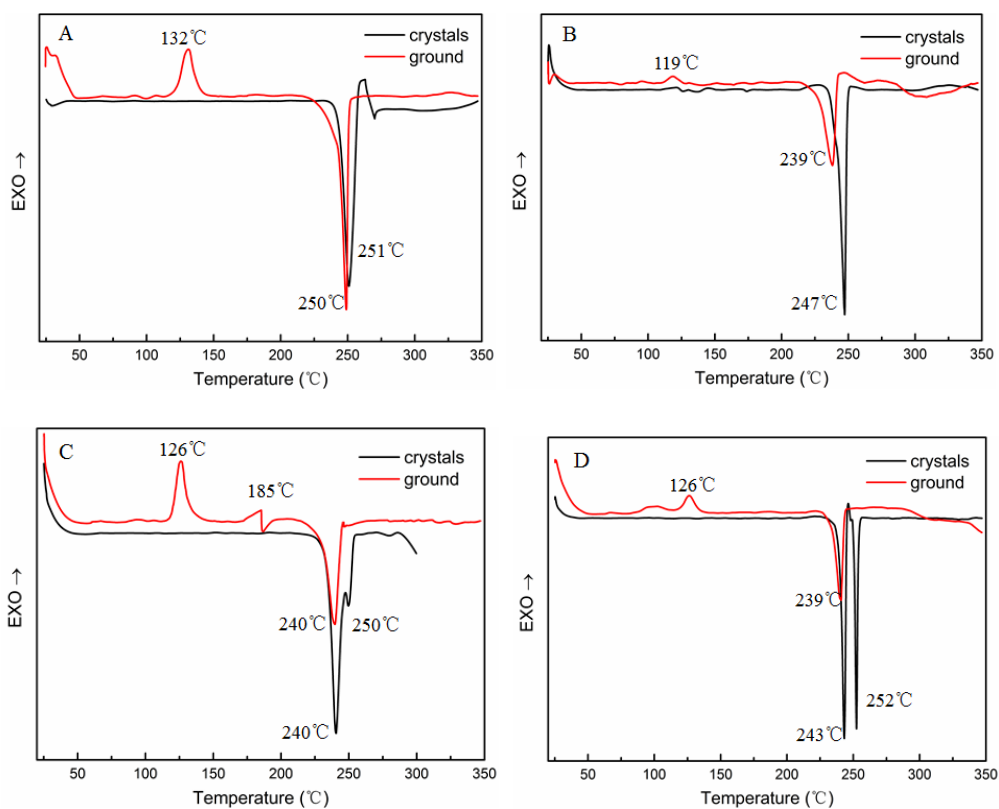

**Fig S1.** DSC thermograms of (A) 2R, (B) 3Y, (C) 3R, (D) 3N in different state.

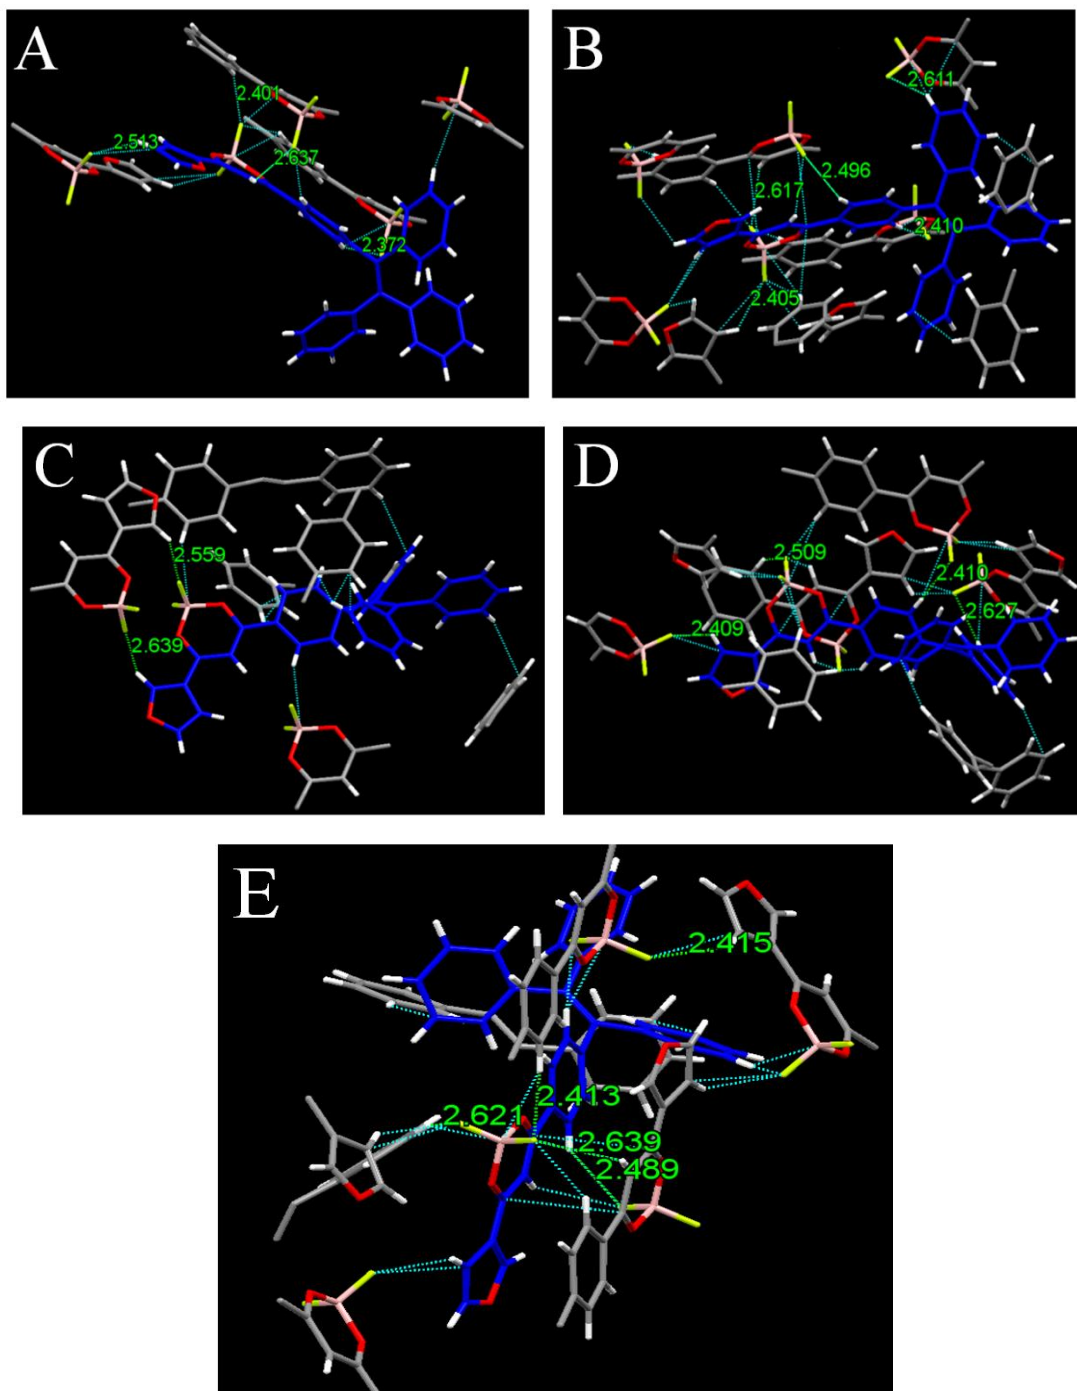

**Fig S2.** Various intermolecular hydrogen bonds and weak interactions of (A) **2R**, (B) **3R** and (C) **3Y**, (D) **3N**, (E) **3F** (Only shows the key length of C-H...F).

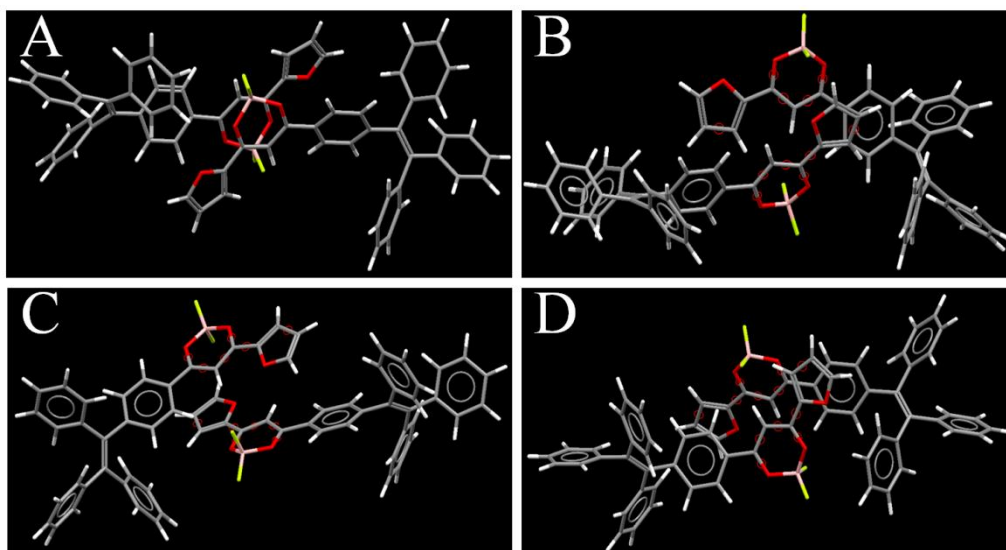

**Fig S4.** Hypothetical crystals of (A) **2Y<sub>a</sub>**, (B) **2Y<sub>b</sub>**, (C) **2Y<sub>c</sub>**, (D) **2Y<sub>a</sub>** based on crystals **3Y** and isomerism.

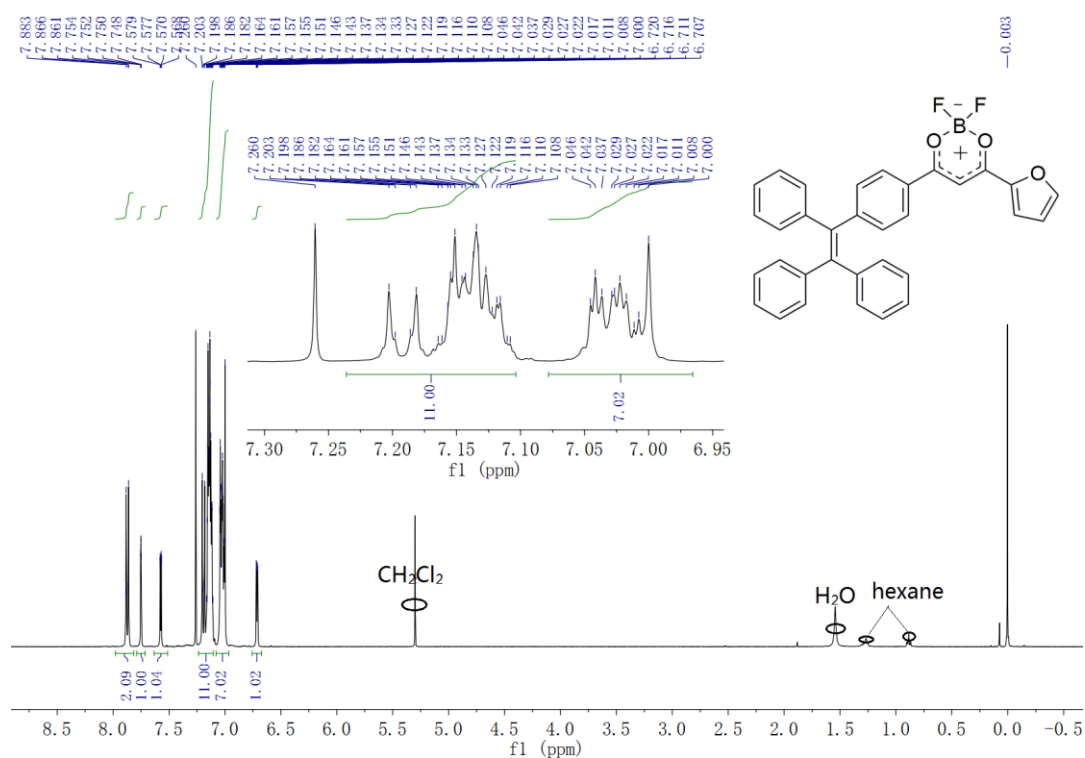

**Fig S5.** <sup>1</sup>H NMR (400 MHz) spectrum of **TPEB2F** in CDCl<sub>3</sub>.



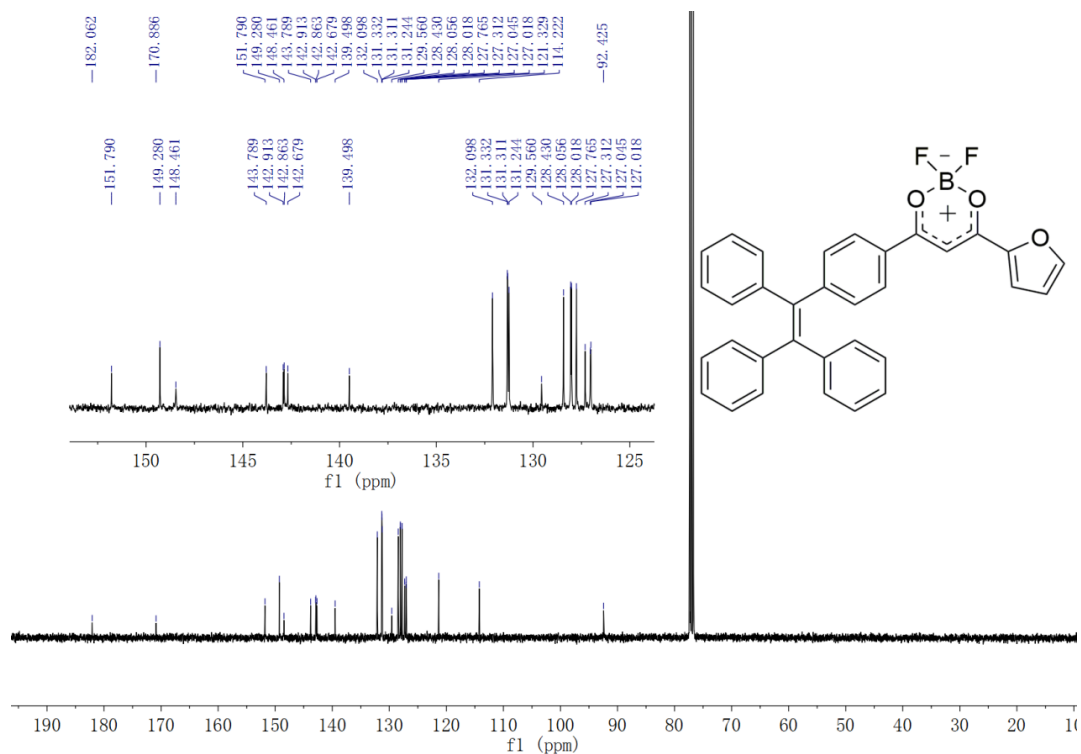

**Fig S6.**  $^{13}\text{C}$  NMR (100 MHz) spectrum of **TPEB2F** in  $\text{CDCl}_3$ .

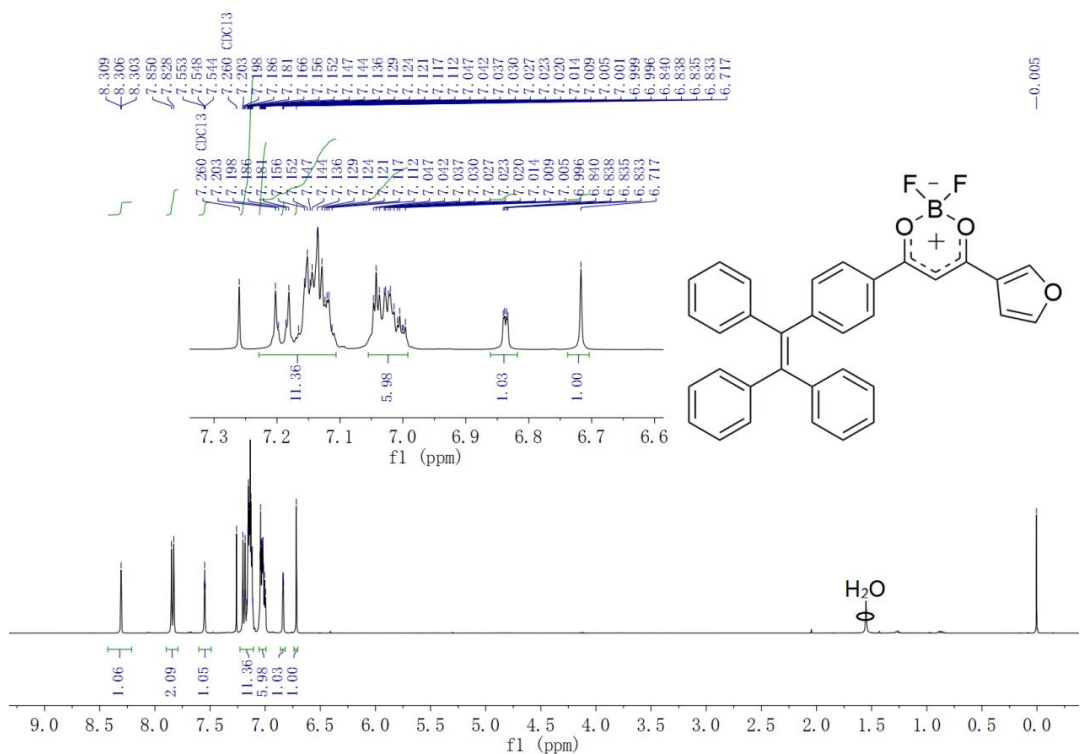

**Fig S7.**  $^1\text{H}$  NMR (400 MHz) spectrum of **TPEB3F** in  $\text{CDCl}_3$ .

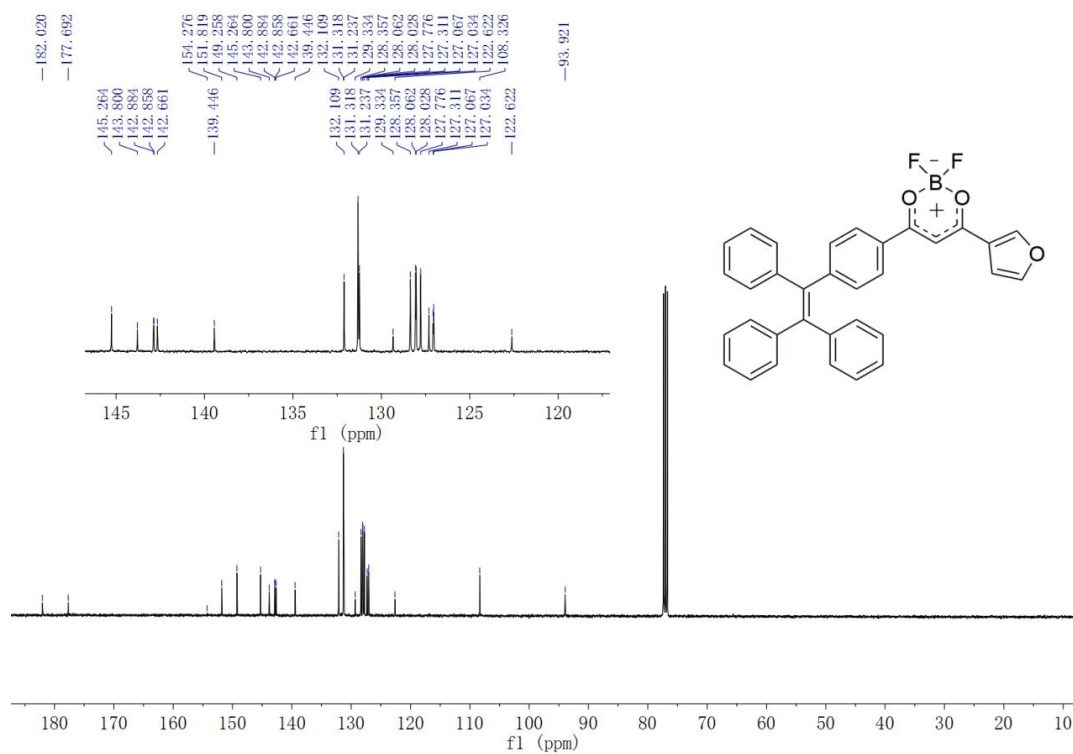

**Fig S8.**  $^{13}\text{C}$  NMR (100 MHz) spectrum of **TPEB3F** in  $\text{CDCl}_3$ .

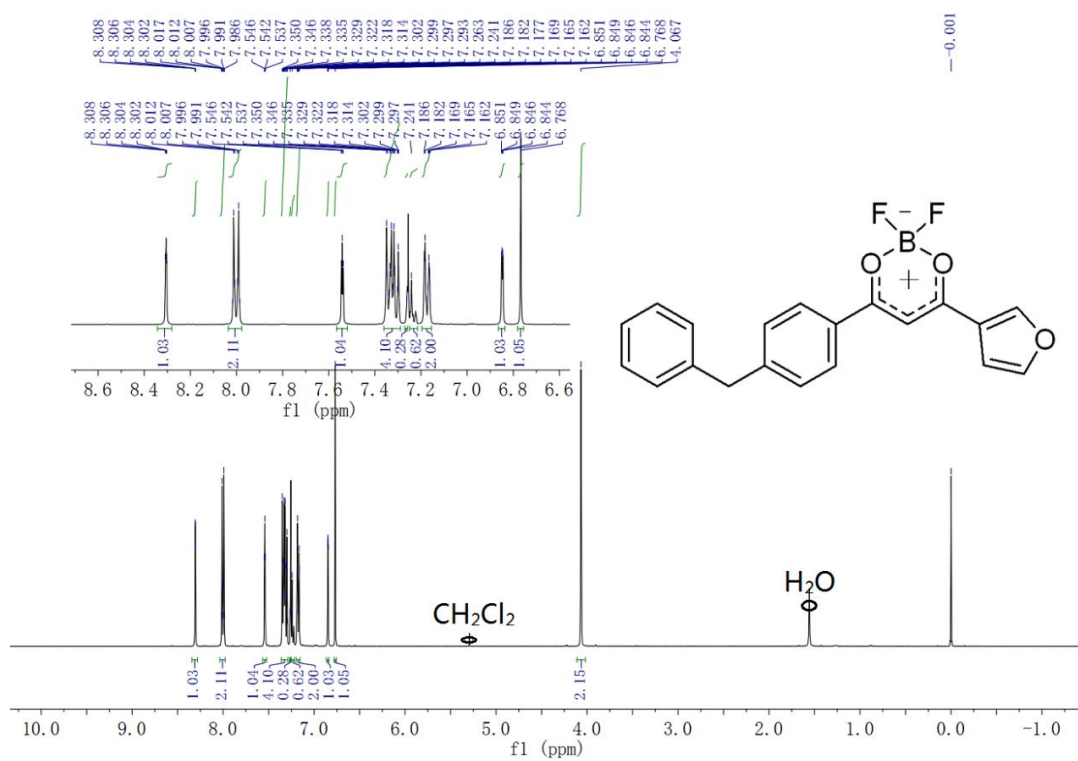

**Fig S9.**  $^1\text{H}$  NMR (400 MHz) spectrum of By-product in  $\text{CDCl}_3$ .

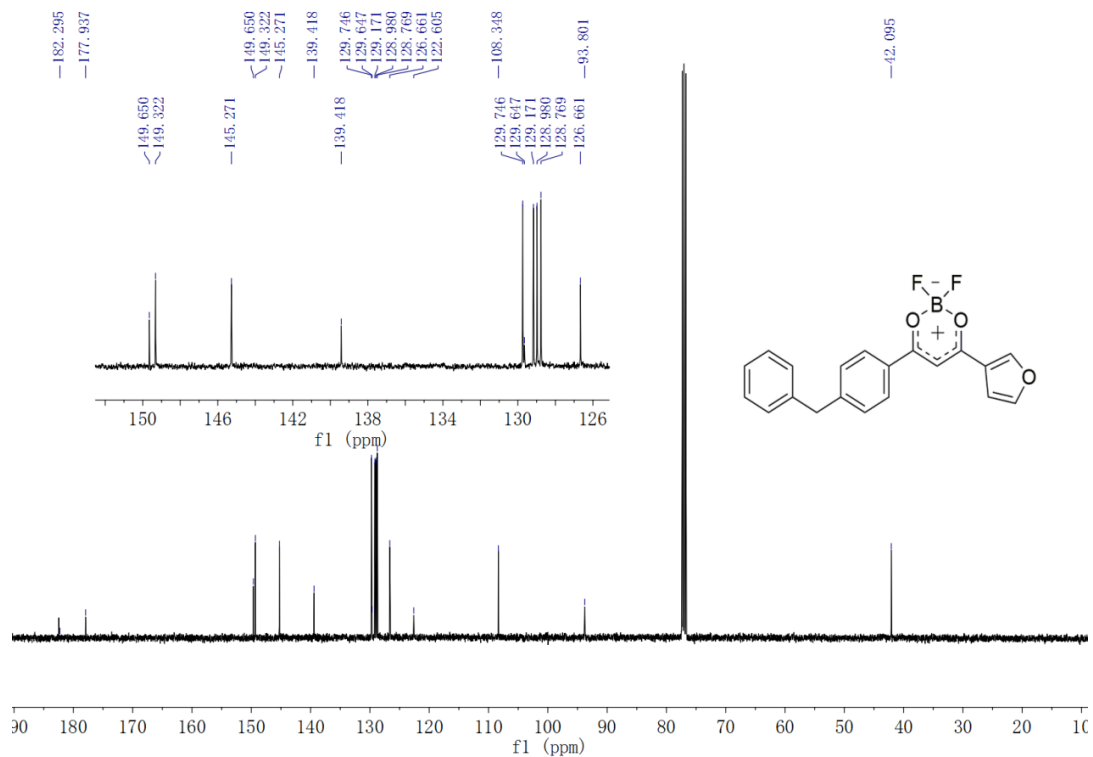

**Fig S10.** <sup>13</sup>C NMR (100 MHz) spectrum of By-product in CDCl<sub>3</sub>.

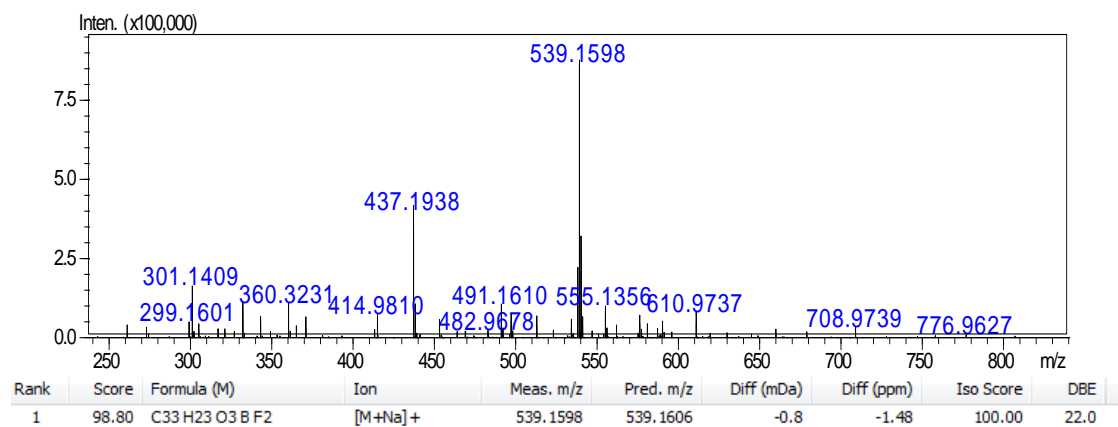

**Figure S11.** MALDI/TOF MS spectrum of TPEB2F.

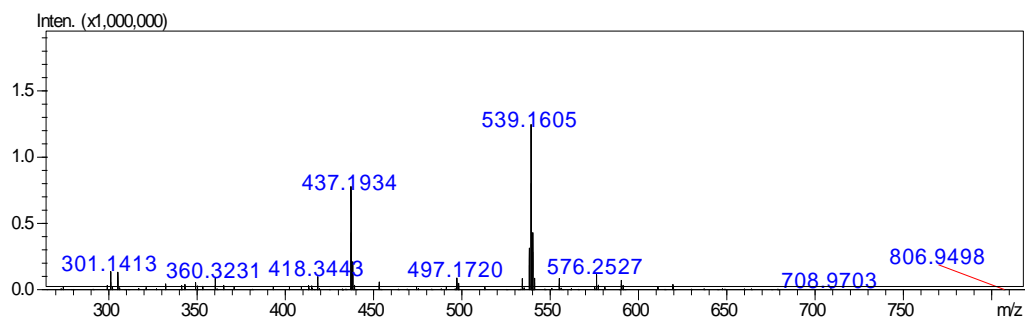

| Rank | Score  | Formula (M)     | Ion                 | Meas. m/z | Pred. m/z | Diff (mDa) | Diff (ppm) | Iso Score | DBE  |
|------|--------|-----------------|---------------------|-----------|-----------|------------|------------|-----------|------|
| 1    | 100.00 | C33 H23 O3 B F2 | [M+Na] <sup>+</sup> | 539.1603  | 539.1606  | -0.3       | -0.56      | 100.00    | 22.0 |

**Figure S12.** MALDI/TOF MS spectrum of **TPEB3F**.
